# Supplementary material for: Effects of Two Feeding Patterns on Growth Performance, Rumen Fermentation Parameters, and Bacterial Community Composition in Yak Calves
Source: MDPI journal article supplement (doi:10.3390/microorganisms11030576), 2023-02-24
Supplement: s1 [file s1]

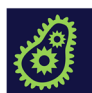**Table S1.** The level of phylum (top 10) and genus (top 20) in terms of relative abundance of microorganisms.

| Taxonomic Level | Microbes                                | Group <sup>1</sup> |       | SEM   | P-value |
|-----------------|-----------------------------------------|--------------------|-------|-------|---------|
|                 |                                         | CON                | TRT   |       |         |
| Phylum          | Bacteroidetes                           | 36.78              | 58.33 | 10.78 | 0.001   |
|                 | Firmicutes                              | 55.47              | 37.01 | 9.23  | 0.003   |
|                 | Actinobacteria                          | 1.93               | 1.20  | 0.37  | 0.437   |
|                 | Saccharibacteria                        | 0.77               | 0.68  | 0.05  | 0.741   |
| Genus           | g__Prevotella_1                         | 15.04              | 39.90 | 12.43 | 0.000   |
|                 | g__unidentified                         | 18.98              | 13.65 | 2.67  | 0.155   |
|                 | g__Quinella                             | 15.78              | 6.45  | 4.67  | 0.328   |
|                 | g__Christensenellaceae_R-7_group        | 6.39               | 6.00  | 0.20  | 0.723   |
|                 | g__Rikenellaceae_RC9_gut_group          | 5.23               | 4.17  | 0.53  | 0.413   |
|                 | g__Succiniclasicum                      | 3.72               | 2.73  | 0.50  | 0.398   |
|                 | g__Ruminococcaceae_NK4A214_group        | 2.62               | 2.52  | 0.05  | 0.881   |
|                 | g__Butyrivibrio_2                       | 2.01               | 1.83  | 0.09  | 0.765   |
|                 | g__Prevotellaceae_UCG-003               | 2.46               | 1.17  | 0.65  | 0.026   |
|                 | g__Prevotellaceae_UCG-001               | 1.34               | 1.64  | 0.15  | 0.582   |
|                 | g__Veillonellaceae_UCG-001              | 1.29               | 0.96  | 0.17  | 0.494   |
|                 | g__Lachnospiraceae_NK3A20_group         | 0.97               | 1.30  | 0.17  | 0.389   |
|                 | g__Olsenella                            | 1.29               | 0.87  | 0.21  | 0.624   |
|                 | g__Lachnospiraceae_XPB1014_group        | 0.69               | 1.44  | 0.38  | 0.005   |
|                 | g__Pseudobutyrvibrio                    | 1.29               | 0.74  | 0.28  | 0.170   |
|                 | g__Ruminococcus_1                       | 1.19               | 0.79  | 0.20  | 0.347   |
|                 | g__Eubacterium_coprostanoli-genes_group | 1.34               | 0.54  | 0.40  | 0.016   |
|                 | g__Ruminococcaceae_UCG-014              | 0.85               | 0.96  | 0.06  | 0.537   |
|                 | g__Saccharofermentans                   | 0.84               | 0.77  | 0.04  | 0.760   |

<sup>1</sup>CON group: breastfeeding; TRT group: Milk Replacer feeding.
